# Supplementary material
Source: publisher figshare collection journal article supplement (https://acs.figshare.com/ndownloader/files/5763231)
Supplement: Supplementary file 1 [file 5763231]

## **SUPPORTING MATERIALS MADE AVAILABLE TO REVIEWERS**

### **Electron Transfer on the Infrared Vibrational Time Scale in 1,4-Pyrazine and 4,4'-Bipyridine Bridged Ruthenium Cluster Charge Transfer Complexes**

Tasuku Ito\*, Tomohiko Hamaguchi, Haruko Nagino, Tadashi Yamaguchi, Hiroaki Kido,<sup>a</sup>

Department of Chemistry, Tohoku University, Aoba, Aramaki, Aoba-ku,

Sendai 980-8578, Japan,

Igor S. Zavarine, Todd Richmond, John Washington, and Clifford P. Kubiak\*<sup>b</sup>

Department of Chemistry, Purdue University, West Lafayette, IN 47907-1393, USA.

\*To whom correspondence should be addressed

<sup>a</sup> Present address : College of Engineering, Nihon University, Koriyama 963-8642, Japan

<sup>b</sup> Present address : Department of Chemistry and Biochemistry, University of California, San Diego, La Jolla, CA 92093-0358

### X-ray data collection and structure determination

Crystals used in the X-ray analysis were obtained as dark deep green prisms by layering a solution of  $[\text{Ru}_3(\mu_3\text{-O})(\text{CH}_3\text{COO})_6(\text{CO})(\text{dmap})(\text{pyrazine})]$  (3 mg/2 mL), EtOH/ $\text{CHCl}_3$  (1/1, 2 mL), and an EtOH solution of  $[\text{Ru}_3(\mu_3\text{-O})(\text{CH}_3\text{COO})_6(\text{CO})(\text{dmap})(\text{H}_2\text{O})]$  (3 mg/2 mL) and allowing the layers to diffuse together over two weeks. The crystals of  $[\{\text{Ru}_3(\mu_3\text{-O})(\text{CH}_3\text{COO})_6(\text{CO})(\text{dmap})\}_2(\text{pyrazine})]$  (**1**) were obtained as chloroform solvates and deteriorated quickly in air owing to the loss  $\text{CHCl}_3$ . Crystallinity therefore was not ideal. Intensity data were collected for three specimens. The best data obtained are as follows. A specimen with dimension of  $0.50 \times 0.10 \times 0.70 \text{ mm}^3$  was sealed in a thin-walled Lindemann glass capillary along with small amount of mother liquor. The specimen was mounted on a Rigaku AFC 7S four circle diffractometer. Crystallographic and structural data are summarized in Table S1.

A total of 7171 independent reflections in the range  $3 < 2\theta < 45^\circ$  were measured at room temperature by using a  $2\theta - \omega$  scan at a scan rate of  $4.0^\circ \text{ min}^{-1}$ . Intensity data were corrected for Lorentz and polarization effects, and for absorption ( $\psi$  scan method).

The structure was solved by automatic Paterson analysis (DIRDIF 94 PATTY) and expanded by alternate difference Fourier syntheses and full matrix least-squares refinement. All non-hydrogen atoms within  $[\{\text{Ru}_3(\mu_3\text{-O})(\text{CH}_3\text{COO})_6(\text{CO})(\text{dmap})\}_2(\text{pyrazine})]$  were unambiguously located. The molecule lies on a crystallographic inversion center. Some of the chloroform molecules were severely disordered. Anisotropic temperature factors were applied to most of non-hydrogen atoms within the  $\text{Ru}_3$  dimer. The final refinement gave  $R = 0.112$  and  $R_w = 0.113$  for 3484 independent reflections having  $I > 3\sigma(I)$  and 437 independent parameters. All calculations were performed using teXsan crystallographic software. An ORTEP drawing of the complex is presented in Figure S1.

Table S1. Crystallographic data for  $[\{\text{Ru}_3\text{O}(\text{CH}_3\text{CO}_2)_6(\text{CO})(\text{dmap})\}_2\text{pz}]\cdot 3\text{CHCl}_3$ 

|                                        |                                                                           |
|----------------------------------------|---------------------------------------------------------------------------|
| Formula                                | $\text{C}_{47}\text{H}_{63}\text{O}_{28}\text{N}_6\text{Ru}_6\text{Cl}_9$ |
| Formula weight                         | 2085.55                                                                   |
| $a$ (Å)                                | 14.075(7)                                                                 |
| $b$ (Å)                                | 16.450(5)                                                                 |
| $c$ (Å)                                | 12.85(2)                                                                  |
| $\alpha$ (°)                           | 93.40(6)                                                                  |
| $\beta$ (°)                            | 112.23(6)                                                                 |
| $\gamma$ (°)                           | 88.09(3)                                                                  |
| $V$ (Å <sup>3</sup> )                  | 2748(4)                                                                   |
| Space Group                            | triclinic $\bar{P}1$ (No.2)                                               |
| Z value                                | 1                                                                         |
| $D_{\text{calc}}$ (g/cm <sup>3</sup> ) | 1.331                                                                     |
| $\mu$ (cm <sup>-1</sup> )              | 11.04                                                                     |
| Transmission coefficient               | 0.7534 - 1.0000                                                           |
| $R$                                    | 0.112                                                                     |
| $R_w$                                  | 0.113                                                                     |
| Goodness of fit indicator              | 5.84                                                                      |

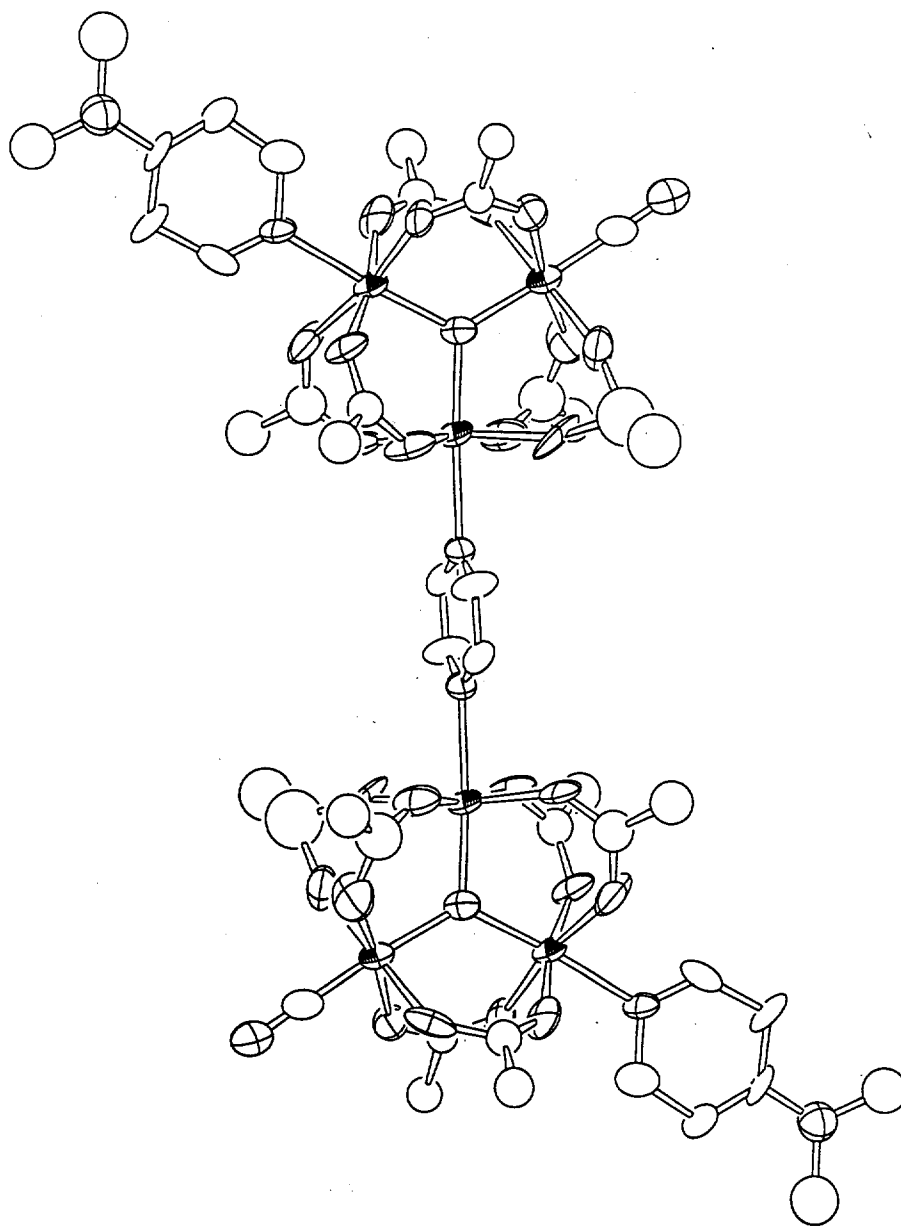

Figure S1.
